# Supplementary material
Source: PubMed Central journal article supplement (PMC7965801)
Supplement: 3746_table.pdf [file 3746_table.pdf]

**On-line Table: Relationship between baseline characteristics, recanalization failure, and complications (embolic and hemorrhagic)**

| Characteristics                                                        | Failure              |                              |                               | Embolic Complication         |                                 |                                | Hemorrhagic Complication        |     |    | P Value |
|------------------------------------------------------------------------|----------------------|------------------------------|-------------------------------|------------------------------|---------------------------------|--------------------------------|---------------------------------|-----|----|---------|
|                                                                        | Overall              | Yes                          | No                            | Yes                          | No                              | Yes                            | No                              | Yes | No |         |
| No. of patients                                                        | 144                  |                              |                               |                              |                                 |                                |                                 |     |    |         |
| Age (median, y)                                                        | 69.5 [26–90]         | 13.9% (20/144)<br>72 [30–90] | 86.1% (124/144)<br>69 [26–90] | 12.5% (18/144)<br>66 [31–86] | 87.5% (126/144)<br>70.5 [26–90] | 20.8% (30/144)<br>74.5 [40–89] | 79.2% (114/144)<br>68.5 [26–90] |     |    | .043    |
| Vascular risk factors                                                  |                      |                              |                               |                              |                                 |                                |                                 |     |    |         |
| Hypertension                                                           | 59.2% (84/142)       | 55.6% (10/18)                | 59.3% (73/123)                | 38.9% (7/18)                 | 62.1% (77/124)                  | 73.3% (22/30)                  | 55.4% (62/112)                  |     |    | .075    |
| Smoking                                                                | 30.7% (42/137)       | 21.1% (4/19)                 | 32.2% (38/118)                | 33.3% (6/18)                 | 30.3% (36/119)                  | 24.1% (7/29)                   | 32.4% (35/108)                  |     |    | .391    |
| Hyperlipidemia                                                         | 28.9% (41/142)       | 15.8% (3/19)                 | 30.9% (38/123)                | 27.8% (5/18)                 | 29% (36/124)                    | 26.7% (8/30)                   | 29.5% (33/112)                  |     |    | .764    |
| Diabetes                                                               | 12.1% (17/141)       | 0%                           | 13.9% (17/122)                | 11.1% (2/18)                 | 12.2% (15/123)                  | 16.7% (5/30)                   | 10.8% (12/111)                  |     |    | .360    |
| Baseline NIHSS score median (n)                                        | 18 (121) [3–36]      | 20 (15) [9–23]               | 18 (106) [3–36]               | 17 (10) [7–22]               | 18 (111) [3–36]                 | 19 [5–23]                      | 18 [3–36]                       |     |    | .476    |
| Occlusion site                                                         |                      |                              |                               |                              |                                 |                                |                                 |     |    | .115    |
| Anterior circulation                                                   | 75.7% (109/144)      | 70% (14/20)                  | 76.6% (95/124)                | 61.1% (11/18)                | 77.8% (98/126)                  | 86.7% (26/30)                  | 72.8% (83/114)                  |     |    |         |
| Posterior circulation                                                  | 24.3% (35/144)       | 30% (6/20)                   | 23.4% (29/124)                | 38.9% (7/18)                 | 22.2% (28/126)                  | 13.3% (4/30)                   | 27.2% (31/114)                  |     |    |         |
| ASPECT score median (n)                                                | 7 (104) [2–10]       | 6 (13) [3–9]                 | 7 (91) [3–10]                 | 7 (10) [3–9]                 | 6 (94) [2–10]                   | 6.5 [3–9]                      | 7 [2–10]                        |     |    | .284    |
| Procedure                                                              |                      |                              |                               |                              |                                 |                                |                                 |     |    | .541    |
| Combined therapy                                                       | 65.3% (94/144)       | 70% (14/20)                  | 64.5% (80/124)                | 55.6% (10/18)                | 66.7% (84/126)                  | 70% (21/30)                    | 64% (73/114)                    |     |    |         |
| Stand-alone thrombectomy                                               | 34.7% (50/144)       | 30% (6/20)                   | 35.5% (44/124)                | 44.4% (8/18)                 | 33.3% (42/126)                  | 30% (9/30)                     | 36% (41/114)                    |     |    |         |
| Time from onset to thrombectomy <sup>a</sup> (median minute, n, range) | 300 (139) [135–1225] | 308 (20) [150–1225]          | 300 (118) [135–939]           | 257 (17) [201–939]           | 301 (122) [135–1225]            | 300 (29) [204–870]             | 303.5 (110) [135–1225]          |     |    | .839    |

<sup>a</sup> In cases of failed recanalization, “time from onset to thrombectomy” was defined as the time between symptom onset and the last pass of the device. In cases of success, it was defined as the time between symptom onset and final recanalization.
